# Supplementary material for: Molecular dynamics and Raman optical activity spectra reveal nucleotide conformation ratios in solution
Source: Royal Society of Chemistry journal article supplement (doi:10.1039/d2cp05756e), 2023-01-01
Supplement: d2cp05756e2.pdf [file d2cp05756e2.pdf]

## Molecular Dynamics and Raman Optical Activity Spectra Reveal Nucleotide Conformation Ratios in Solution

Věra Schrenková, Mohammed Siddhique Para Kkadan, Jiří Kessler,  
Josef Kapitán, and Petr Bouř

### Contents

[Table S1.](#) Differences in the GAFF, GAFF2, RNA.OL3 and DNA.Bsc1 force fields.

[Table S2.](#) Relative conformer energies of the four nucleotides as obtained by WHAM.

[Table S3.](#) Assignment of selected Raman and ROA bands.

[Figure S1.](#) ROA and Raman spectra of a dGMP calculated with the B3LYP and B3PW91 functionals.

[Figure S2.](#) dTMP ROA and Raman spectra simulated with explicit and CPCM water model.

[Figure S3.](#) MD time-evolution of selected geometrical parameters in the four nucleosides.

[Figure S4.](#) Dependence of the free energy on selected coordinates as obtained from free MD.

[Figure S5.](#) rGMP and rAMP spectra calculated with various numbers of MD snapshots.

[Figure S6.](#) Raman and ROA spectra calculated for individual conformers.

[Figure S7.](#) Arbitrary energy maps obtained by the fitting of the spectra.

[Figure S8.](#) Calculated ROA spectra of the nucleotide conformers with *syn* or *anti* conformation.

[Figure S9.](#) Experimental Raman and ROA spectra in the full range.

**Table S1.** Examples of different parameters used in the GAFF, GAFF2, RNA.OL3 and DNA.Bsc1 force fields.<sup>a</sup>

|                                                                        | GAFF            | GAFF2           | RNA.OL3         | DNA.Bsc1        |
|------------------------------------------------------------------------|-----------------|-----------------|-----------------|-----------------|
| Equilibrium Bond Lengths (Å)                                           |                 |                 |                 |                 |
| P-O                                                                    | 1.487           | 1.487           | 1.480           | 1.480           |
| O3'-H                                                                  | 0.973           | 0.973           | 0.960           | 0.960           |
| C4-C5                                                                  | 1.373           | 1.373           | 1.370           | 1.370           |
| Bond Force Constants (kcal mol <sup>-1</sup> Å <sup>-2</sup> )         |                 |                 |                 |                 |
| P-O                                                                    | 479.5           | 529.5           | 525.0           | 525.0           |
| O3'-H                                                                  | 371.4           | 563.5           | 553.0           | 553.0           |
| C4-C5                                                                  | 500.9           | 416.1           | 520.0           | 520.0           |
| Equilibrium Bond Angles (degrees)                                      |                 |                 |                 |                 |
| O5'-C5'-C4'                                                            | 108.0           | 108.0           | 109.5           | 109.5           |
| C4'-C3'-O3'                                                            | 110.2           | 110.2           | 109.5           | 109.5           |
| O4'-C1'-N9                                                             | 109.0           | 109.0           | 109.5           | 109.5           |
| Bond Angle Force Constant (kcal mol <sup>-1</sup> rad <sup>-2</sup> )  |                 |                 |                 |                 |
| O5'-C5'-C4'                                                            | 68.9            | 85.3            | 50.0            | 50.0            |
| C4'-C3'-O3'                                                            | 67.5            | 84.6            | 50.0            | 50.0            |
| O4'-C1'-N9                                                             | 71.3            | 109.3           | 50.0            | 50.0            |
| Dihedral Angles <sup>b</sup> $B$ (kcal/mol) / $\varphi$ (degree) / $n$ |                 |                 |                 |                 |
| P-O5'-C5'-C4'                                                          | 0.383 / 0 / 3   | 0.383 / 0 / 3   | 0.383 / 0 / 3   | 0.383 / 0 / 3   |
|                                                                        | 3.950 / 180 / 1 | 3.950 / 180 / 1 | 3.950 / 180 / 1 | 3.950 / 180 / 1 |
| O4'-C1'-C2'-O2'                                                        | 0.144 / 0 / 3   | 1.010 / 0 / 3   | 0.144 / 0 / 3   | 0.144 / 0 / 3   |
|                                                                        | 1.175 / 0 / 2   | 0.000 / 0 / 2   | 1.175 / 0 / 2   | 1.175 / 0 / 2   |
|                                                                        | -               | 0.020 / 180 / 1 | -               | -               |
| O4'-C1'-N9-C8                                                          | -               | -               | 0.00 / 0 / 2    | 0.44 / 210 / 3  |
|                                                                        | -               | -               | 2.50 / 0 / 1    | 1.73 / 4 / 2    |
|                                                                        | -               | -               | -               | 0.81 / 88 / 1   |

<sup>a</sup> The general amber force field (GAFF)<sup>1</sup> was later updated to the second-generation GAFF (GAFF2),<sup>2</sup> e.g. using quantum mechanics (QM) calculations on more model compounds. RNA.OL3<sup>3</sup> was developed from the ff99 force field<sup>4</sup> highly exploiting QM calculations for sugars and phosphates, also with refinements of the glycosidic torsion, DNA.Bsc1<sup>5</sup> development similarly includes QM and solvation models. Technically, DNA.Bsc1 largely consists of RNA.OL3 completed by other parameters. In our calculations, partial atomic charges as obtained from a QM computations were the same for all the four force fields.

<sup>b</sup> Energy  $\sim B[1 + \cos(n\tau - \varphi)]$ , where  $B$  is the barrier and  $\varphi$  is the phase.

1. J. Wang, R. M. Wolf, J. W. Caldwell, P. A. Kollman and D. A. Case, *J. Comput. Chem.*, 2004, **25**, 1157-1174.
2. W. D. Cornell, P. Cieplak, C. I. Bayly, I. R. Gould, K. M. Merz, D. M. Ferguson, D. C. Spellmeyer, T. Fox, J. W. Caldwell and P. A. Kollman, *J. Am. Chem. Soc.*, 1995, **117**, 5179-5197.
3. M. Zgarbová, M. Otyepka, J. Šponer, A. Mládek, P. Banáš, T. E. Cheatham, III and P. Jurečka, *J. Chem. Theory Comput.*, 2011, **7**, 2886-2902.
4. A. Spasic, J. Serafini and D. H. Mathews, *J. Chem. Theory Comput.*, 2012, **8**, 2497-2505.
5. I. Ivani, P. D. Dans, A. Noy, A. Pérez, I. Faustino, A. Hospital, J. Walther, P. Andrio, R. Goñi, A. Balaceanu, et al., *Nat. Methods*, 2016, **13**, 55-58.

**Table S2.** Relative energies ( $E$ , kcal/mol), populations ( $p$ , %) and geometries of the lowest-energy minima ( $<2.5$  kcal/mol) of the four nucleotides as obtained by WHAM.

| Conformer                           |     | $E$ | $p$ | $\gamma$ | $\chi$ | $\chi, \gamma$ integration range                    |
|-------------------------------------|-----|-----|-----|----------|--------|-----------------------------------------------------|
| <b>dTMP</b>                         |     |     |     |          |        |                                                     |
| <i>anti</i> / <i>g</i> <sup>-</sup> | I   | 2.1 | 8   | -57      | -147   | $\gamma \in (-120, 80)$                             |
| <i>anti</i> / <i>t</i>              | II  | 0   | 92  | 177      | -149   | $\gamma \notin (-120, 80)$                          |
| <b>rCMP</b>                         |     |     |     |          |        |                                                     |
| <i>anti</i> / <i>g</i> <sup>-</sup> | I   | 0   | 58  | -57      | 179    | $\chi \notin (-10, 120)$ , <i>anti</i>              |
| <i>syn</i> / <i>g</i> <sup>-</sup>  | III | 0.5 | 42  | -57      | 63     | $\chi \in (-10, 120)$ , <i>syn</i>                  |
| <b>rGMP</b>                         |     |     |     |          |        |                                                     |
| <i>anti</i> / <i>g</i> <sup>-</sup> | I   | 0   | 68  | -61      | -177   | $\gamma \in (-105, 0)$ , $\chi \notin (-90, 90)$    |
| <i>anti</i> / <i>t</i>              | II  | 0.2 | 24  | -177     | 179    | $\gamma \notin (-105, 0)$ , $\chi \notin (-90, 90)$ |
| <i>syn</i> / <i>g</i> <sup>-</sup>  | III | 1.3 | 6   | -59      | 61     | $\gamma \in (-105, 0)$ , $\chi \in (-90, 90)$       |
| <i>syn</i> / <i>t</i>               | IV  | 2.0 | 2   | -177     | 63     | $\gamma \notin (-105, 0)$ , $\chi \in (-90, 90)$    |
| <b>rAMP</b>                         |     |     |     |          |        |                                                     |
| <i>anti</i> / <i>t</i>              | I   | 0   | 79  | -179     | 179    | $\gamma \in (-105, 0)$ , $\chi \notin (-90, 90)$    |
| <i>anti</i> / <i>g</i> <sup>-</sup> | II  | 1.3 | 16  | -65      | 179    | $\gamma \notin (-105, 0)$ , $\chi \notin (-90, 90)$ |
| <i>syn</i> / <i>t</i>               | IV  | 2.0 | 5   | 179      | 67     | $\chi \in (-90, 90)$                                |

**Table S3.** Experimental and raw<sup>a</sup> computed frequencies (cm<sup>-1</sup>), assignment of selected Raman bands.

| <b>dTMP</b> | $V_{\text{exp}}$ | $V_{\text{sim}}$ | assignment                                                                   |
|-------------|------------------|------------------|------------------------------------------------------------------------------|
| Raman       |                  |                  |                                                                              |
| 1           | 498              | 491              | sugar and base deformation                                                   |
| 2           | 751-791          | 765-798          | base out of plane deformation                                                |
| 3           | 979              | 1006             | $\nu(\text{P}=\text{O})$                                                     |
| 4           | 1205             | 1212             | $\nu(\text{C}-\text{N}), \nu(\text{C}-\text{C}), \delta(\text{C}'-\text{H})$ |
| 5           | 1241             | 1274             | base def., $\delta(\text{CH})$                                               |
| 6           | 1377             | 1397             | $\delta(\text{CH})$                                                          |
| 7           | 1663             | 1699             | $\nu(\text{C}=\text{O}), \nu(\text{C}=\text{N}), \nu(\text{C}=\text{C})$     |
| ROA         |                  |                  |                                                                              |
| I           | 341              | 372              |                                                                              |
| II          | 751-793          | 762-799          |                                                                              |
| III         | 1093             | 1094             |                                                                              |
| IV          | 1208             | 1233             |                                                                              |
| V           | 1278             | 1307             |                                                                              |
| VI          | 1316             | 1354             |                                                                              |
| VII         | 1367             | 1395             |                                                                              |
| VIII        | 1448             | 1486             |                                                                              |
| IX          | 1657             | 1697             |                                                                              |

| <b>rCMP</b> | $V_{\text{exp}}$ | $V_{\text{sim}}$ | assignment                                                            |
|-------------|------------------|------------------|-----------------------------------------------------------------------|
| Raman       |                  |                  |                                                                       |
| 1           | 599              | 603              | sugar and base deformation                                            |
| 2           | 784              | 797              | base out of plane deformation                                         |
| 3           | 873              | 888              | sugar and base deformation                                            |
| 4           | 980              | 1006             | $\nu(\text{P}=\text{O})$                                              |
| 5           | 1243             | 1233             | base def., $\delta(\text{CH})$                                        |
| 6           | 1295             | 1325             | $\delta(\text{CH})$                                                   |
| 7           | 1530             | 1573             | $\nu(\text{C}-\text{C}), \nu(\text{C}-\text{N})$                      |
| 8           | 1608             | 1639             | $\delta(\text{NH}_2)$                                                 |
| 9           | 1656             | 1689             | $\nu(\text{C}=\text{O}), \nu(\text{C}=\text{C}), \delta(\text{NH}_2)$ |
| ROA         |                  |                  |                                                                       |
| I           | 287              | 270              |                                                                       |
| II          | 720              | 727              |                                                                       |
| III         | 788              | 796              |                                                                       |
| IV          | 1113             | 1143             |                                                                       |
| V           | 1246             | 1229             |                                                                       |
| VI          | 1352             | 1365             |                                                                       |
| VII         | 1412             | 1445             |                                                                       |
| VIII        | 1532             | 1574             |                                                                       |

**Table S2** (cont.)

| <b>rGMP</b> | $V_{\text{exp}}$ | $V_{\text{sim}}$ | assignment                                                             |
|-------------|------------------|------------------|------------------------------------------------------------------------|
| Raman       |                  |                  |                                                                        |
| 1           | 502              | 504              | sugar and base deformation                                             |
| 2           | 673              | 691              | sugar and base deformation                                             |
| 3           | 979              | 1007             | $\nu(\text{P=O})$                                                      |
| 4           | 1179             | 1212             | sugar and base deformation                                             |
| 5           | 1324             | 1367             | $\delta(\text{CH})$                                                    |
| 6           | 1367             | 1407             | $\delta(\text{CH})$                                                    |
| 7           | 1417             | 1451             | $\nu(\text{C=N}), \nu(\text{C=C}), \delta(\text{CH})$                  |
| 8           | 1488             | 1536             | $\nu(\text{C=C}), \nu(\text{C=N}), \delta(\text{NH})$                  |
| 9           | 1577             | 1617             | $\nu(\text{C=O}), \nu(\text{C=C}), \nu(\text{C=N}), \delta(\text{NH})$ |
| ROA         |                  |                  |                                                                        |
| I           | 368              | 387              |                                                                        |
| II          | 588              | 606              |                                                                        |
| III         | 868              | 886              |                                                                        |
| IV          | 1129             | 1086             |                                                                        |
| V           | 1179             | 1118             |                                                                        |
| VI          | 1215             | 1243             |                                                                        |
| VII         | 1320             | 1358             |                                                                        |
| VIII        | 1358             | 1394             |                                                                        |
| IX          | 1425             | –                |                                                                        |
| X           | –                | 1495             |                                                                        |
| <b>rAMP</b> | $V_{\text{exp}}$ | $V_{\text{sim}}$ | assignment                                                             |
| Raman       |                  |                  |                                                                        |
| 1           | 729              | 749              | base out of plane deformation                                          |
| 2           | 979              | 1007             | $\nu(\text{P=O})$                                                      |
| 3           | 1308             | 1341             | base def., $\delta(\text{CH})$                                         |
| 4           | 1339             | 1389             | $\delta(\text{CH})$                                                    |
| 5           | 1379             | 1417             | $\nu(\text{C=C}), \nu(\text{C=N}), \delta(\text{CH})$                  |
| 6           | 1484             | 1525             | $\delta(\text{CH}), \delta(\text{NH})$                                 |
| 7           | 1510             | 1550             | $\nu(\text{C=C}), \nu(\text{C=N}), \delta(\text{CH})$                  |
| 8           | 1581             | 1629             | $\nu(\text{C=C}), \nu(\text{C=N}), \delta(\text{NH})$                  |
| ROA         |                  |                  |                                                                        |
| I           | 244              | 264              |                                                                        |
| II          | 561              | 586              |                                                                        |
| III         | 886              | 881              |                                                                        |
| IV          | 1241             | 1242             |                                                                        |
| V           | 1311             | 1343             |                                                                        |
| VI          | 1350             | 1414             |                                                                        |
| VII         | 1510             | 1549             |                                                                        |

<sup>a</sup> Only the P=O force constant was scaled (see ref. 54 in the main text), so that the PO stretching had similar systematic frequency error as other vibrations, and resultant spectrum could be more easily compared to the experiment, e.g. after one-step scaling of all frequencies.

$\nu$  ... stretching,  $\delta$  ... bending.

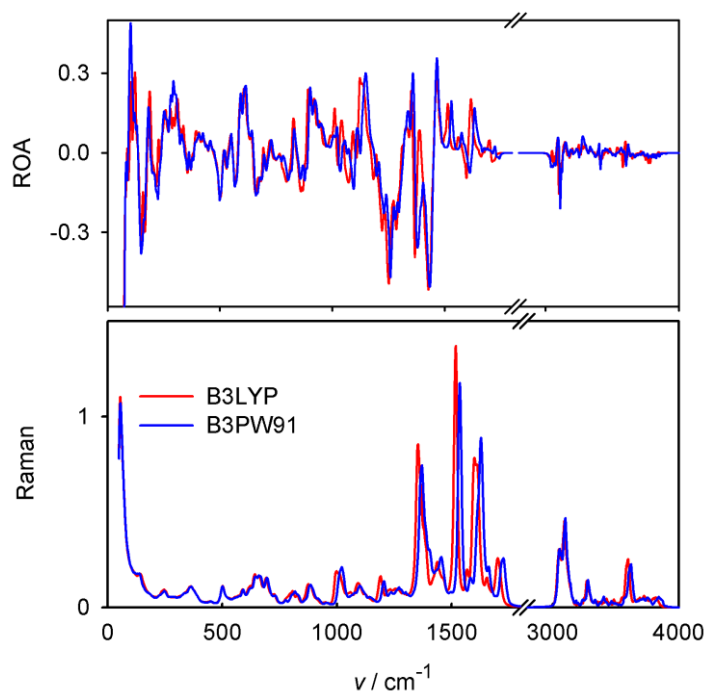

**Figure S1.** ROA and Raman spectra of a rGMP MD snapshot calculated with the B3LYP and B3PW91 functionals (for 6-31++G\*\* and CPCM).

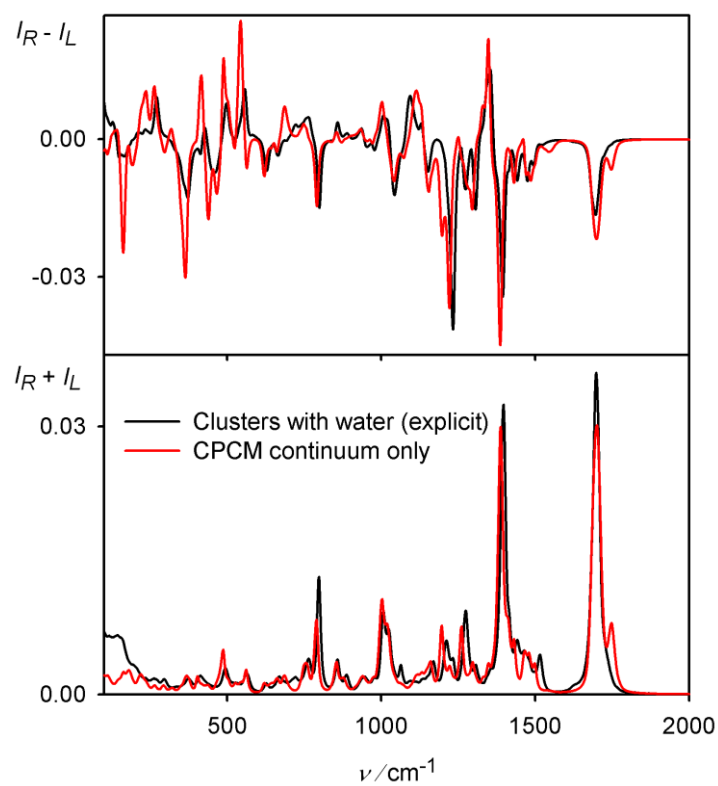

**Figure S2.** dTMP ROA and Raman spectra simulated from MD snapshots with explicit water molecules, and with CPCM only.

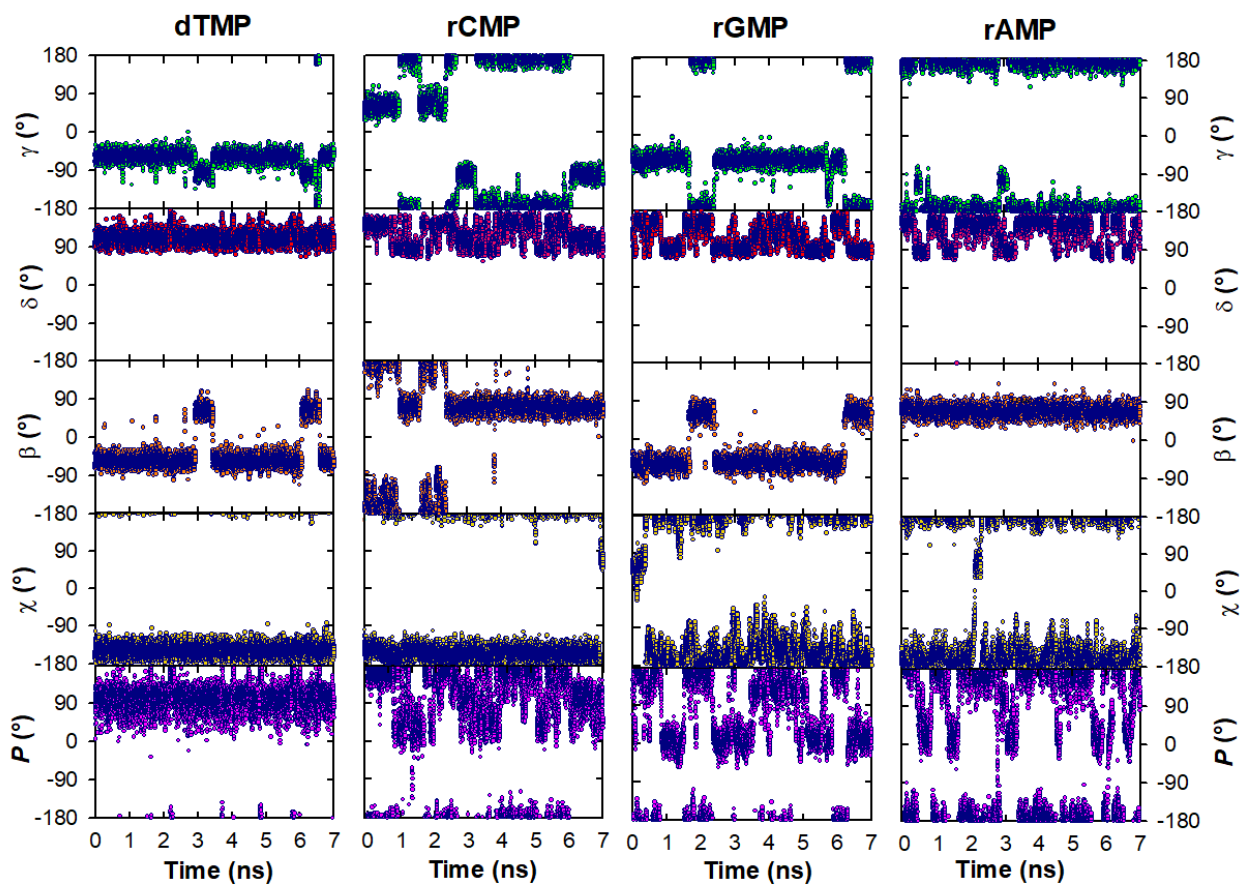

**Figure S3.** Time-evolution of selected geometrical parameters in the four nucleosides during MD, GAFF2 force field.

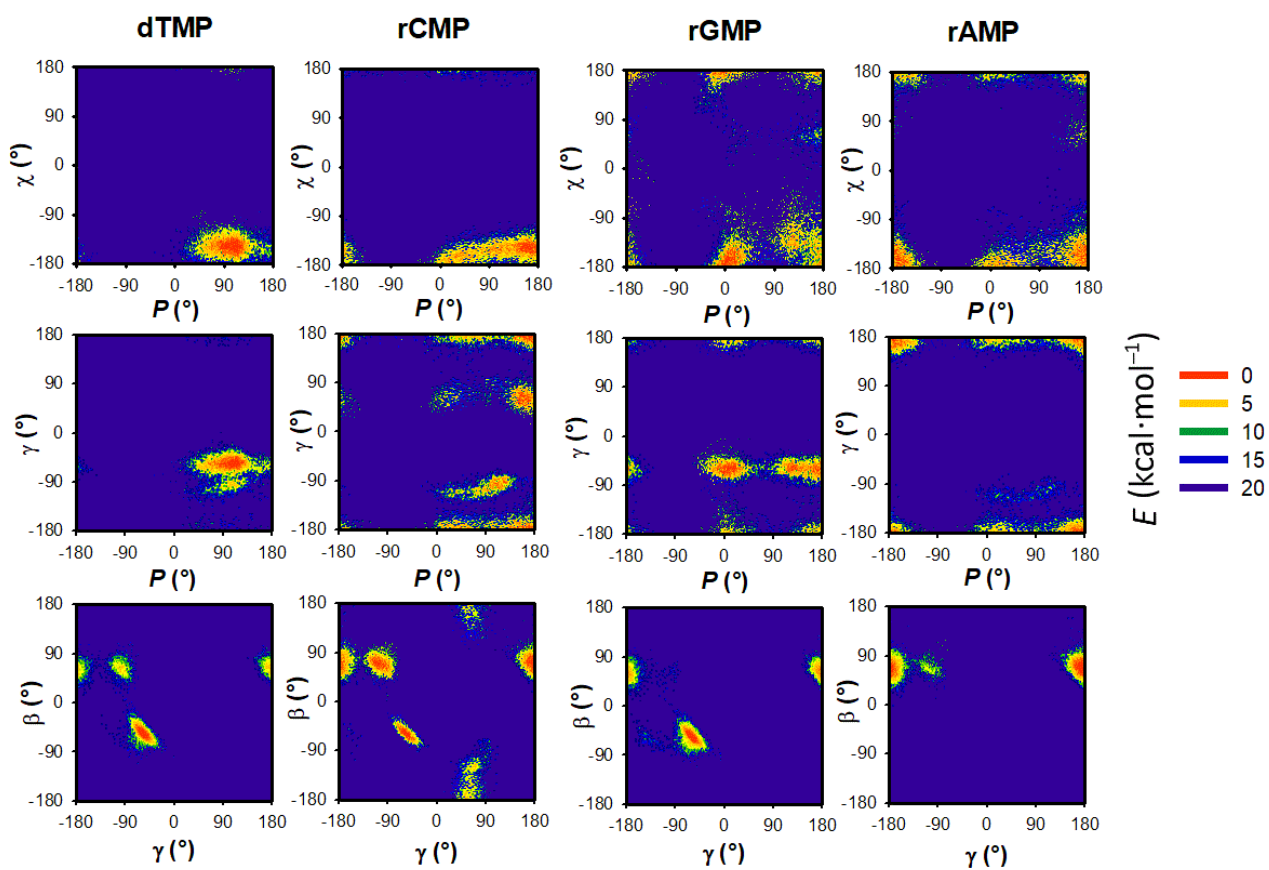

**Figure S4.** Dependence of the free energy on the backbone torsion angles ( $\beta$ ,  $\gamma$  and  $\delta$ ), glycosidic bond torsion angle ( $\chi$ ) and pseudorotation angle ( $P$ ), as obtained from free MD, GAFF2 force field.



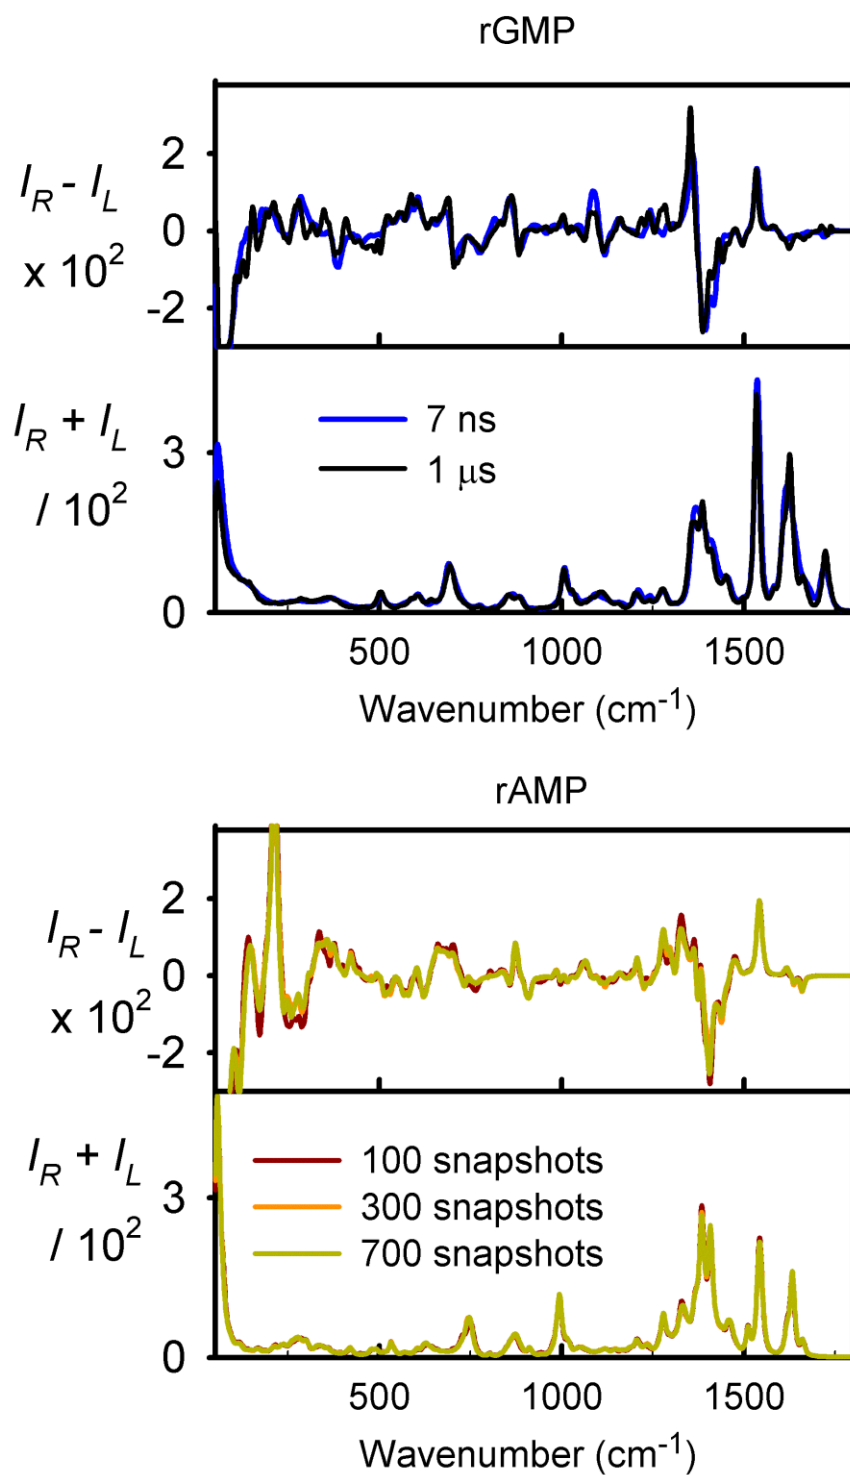

**Figure S5.** Convergence tests: rGMP spectra generated from 7 ns (700 snapshots, 10 ps intervals) and 1  $\mu$ s (100 snapshots, 10 ns intervals), and rAMP spectra generated with 100, 300 and 700 snapshots (10 ps intervals), free MD runs.

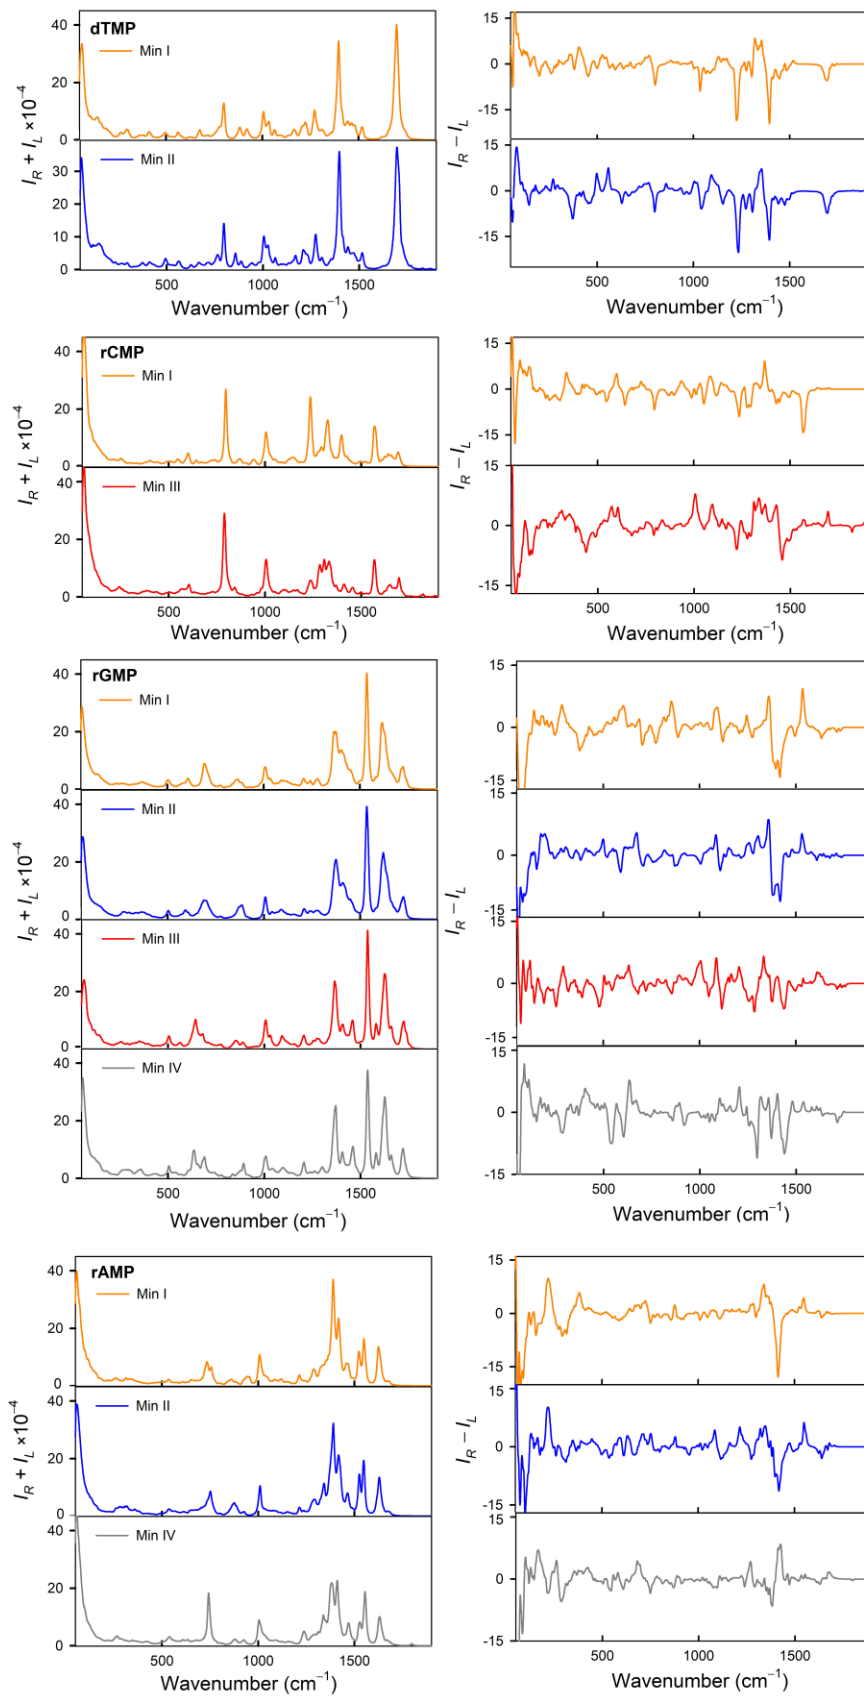

**Figure S6.** Raman and ROA spectra calculated for conformers corresponding to WHAM minima. Each spectrum is an average of at least 50 snapshots.

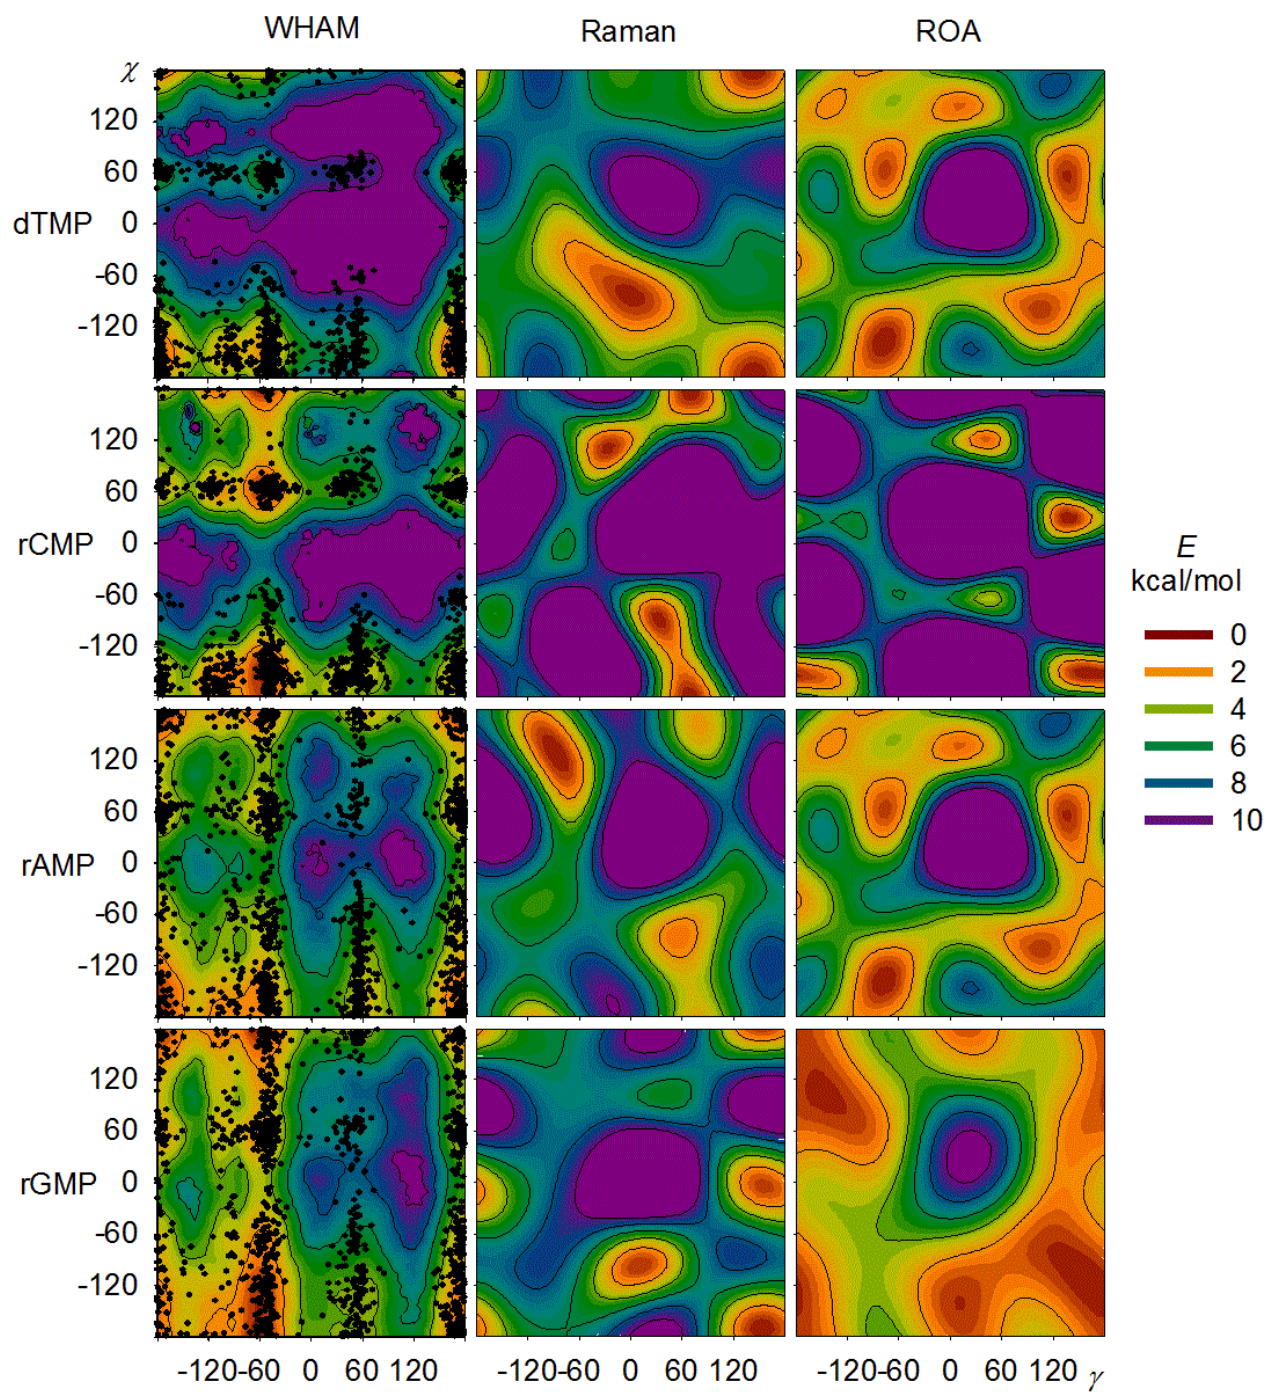

**Figure S7.** Dependence of the free energy on the  $(\gamma, \chi)$  angles obtained by MD-WHAM, and arbitrary maps obtained by decomposition of experimental Raman and ROA spectra. The snapshots used in the decomposition are indicated by the black dots.

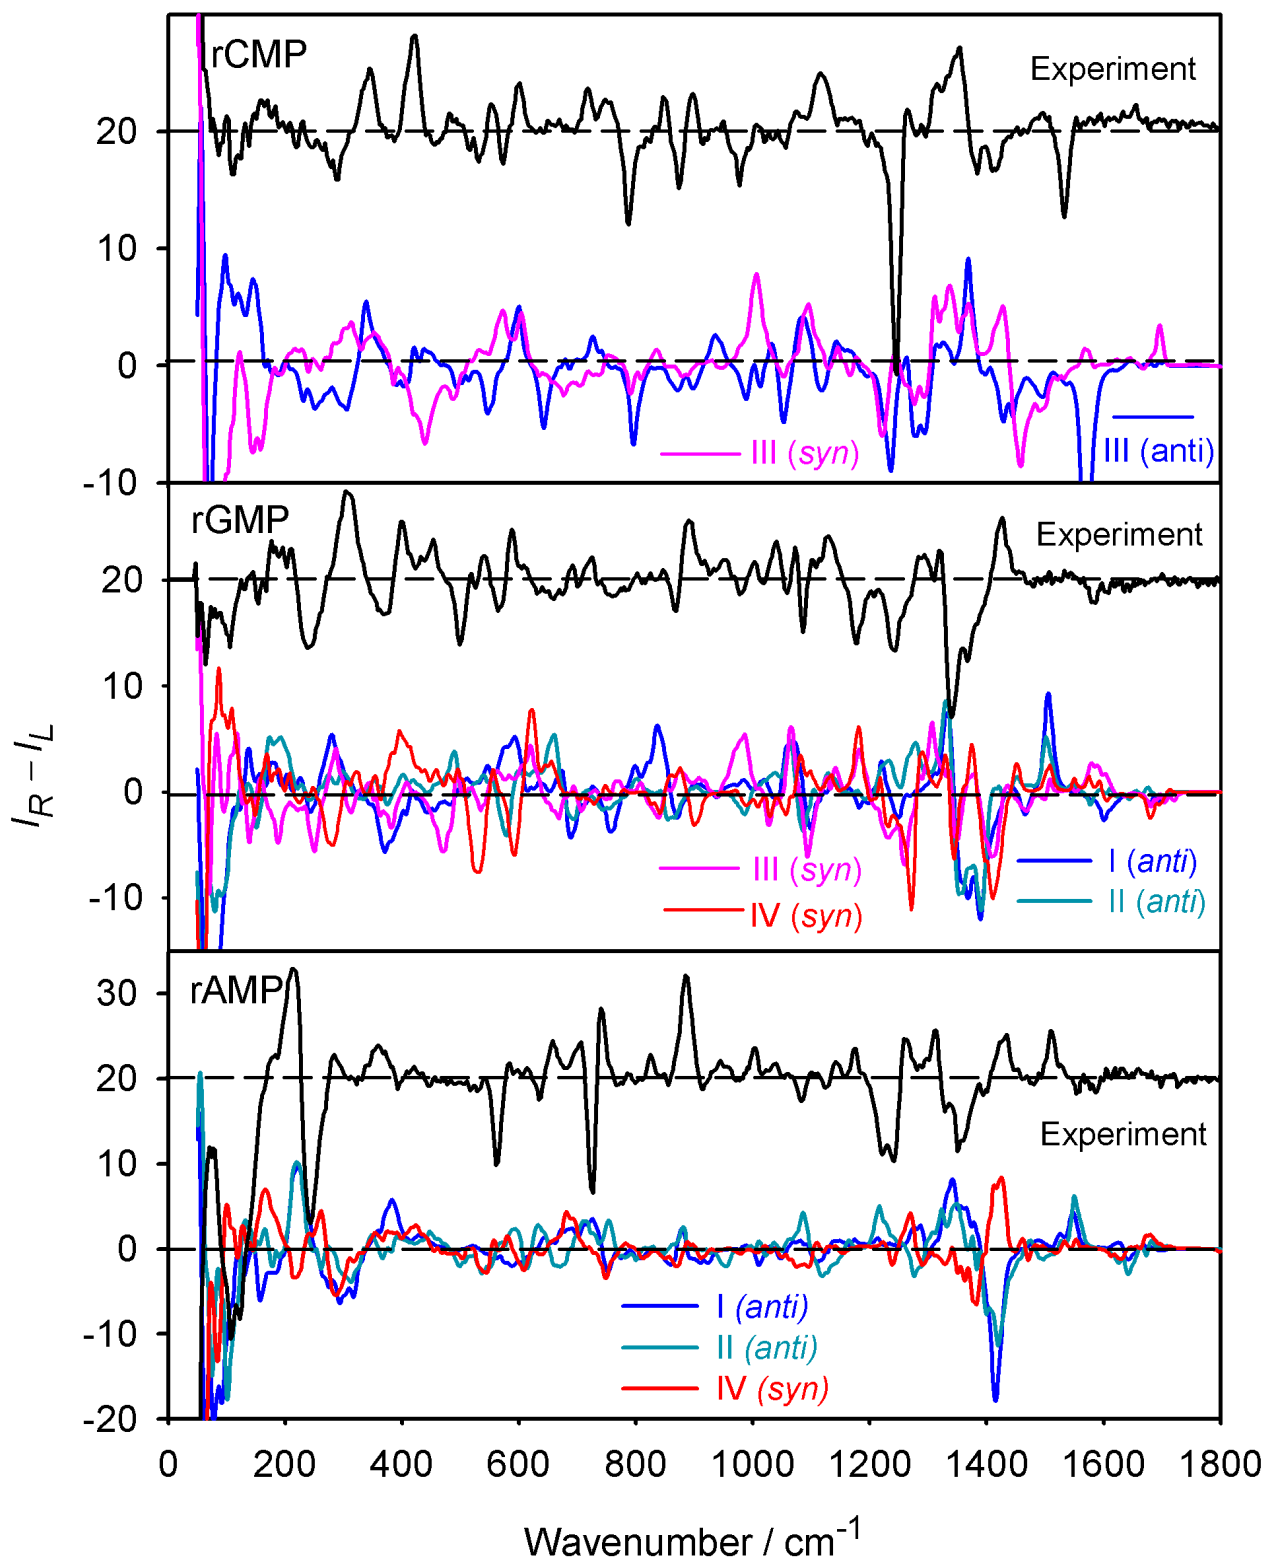

**Figure S8.** Calculated ROA spectra of the nucleotide conformers with *syn* or *anti* conformation of the base (MD average, frequency multiplied by 0.98), and the experiment. For dTMP the *syn* conformation was not present in MD. The experimental spectra are arbitrarily shifted and scaled in the intensity axis.

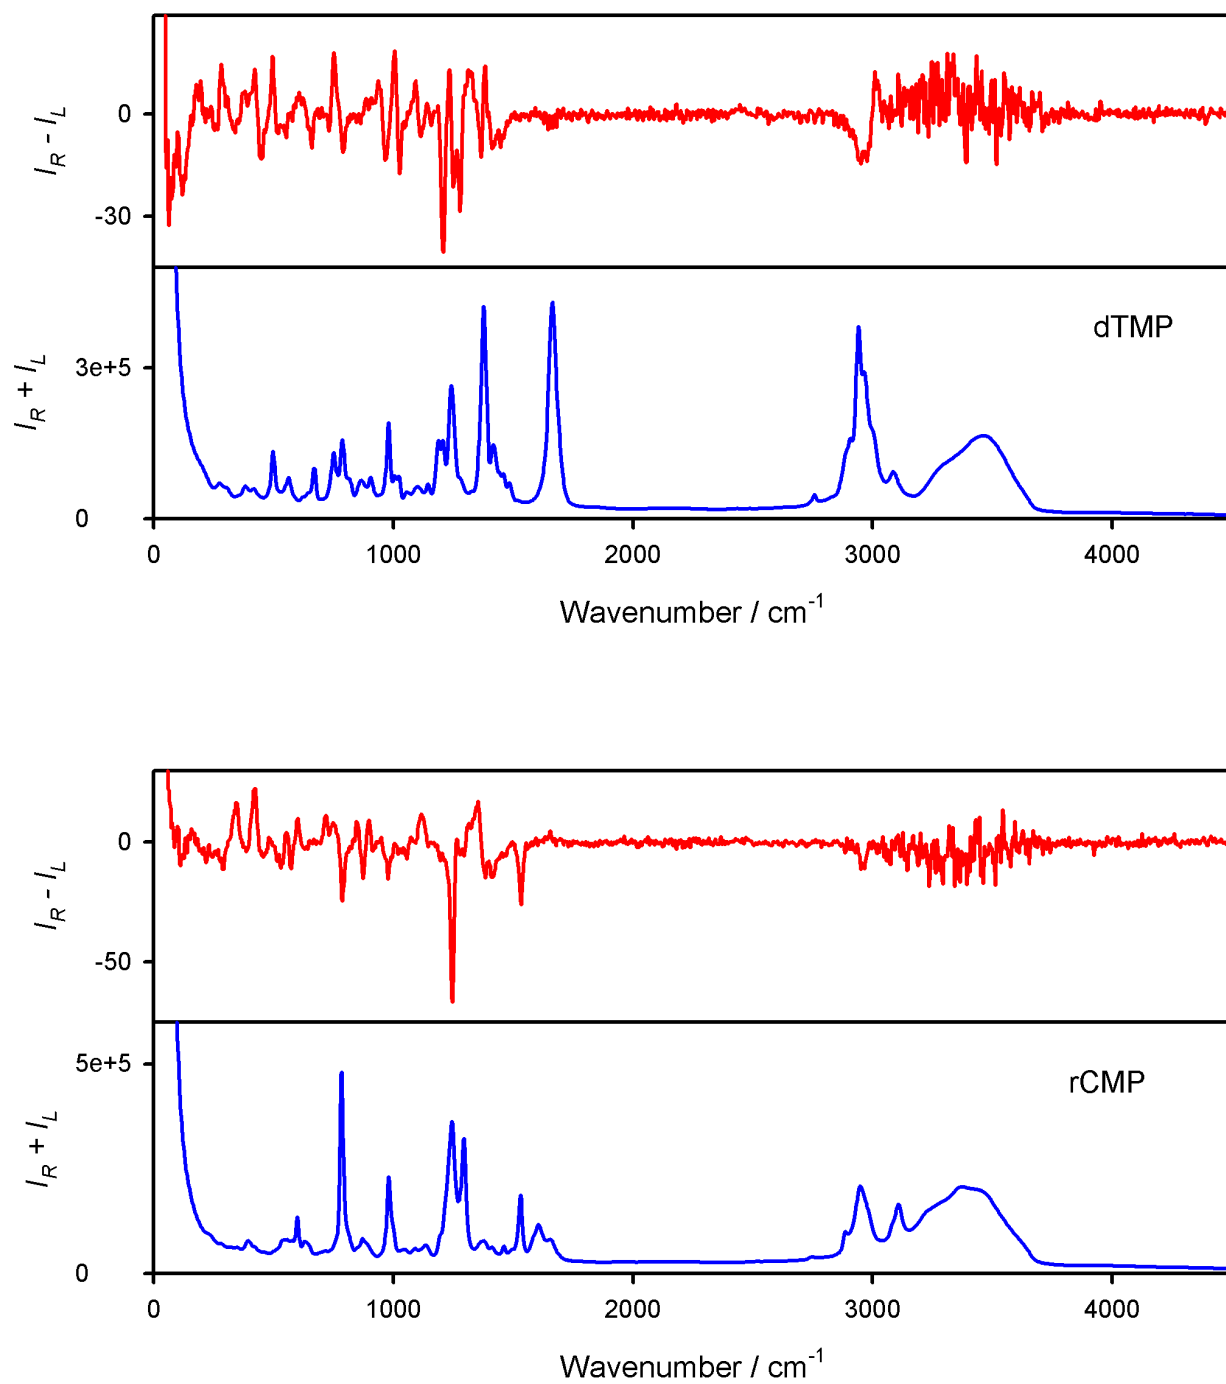

**Figure S9.** Experimental Raman and ROA spectra in the full range of wavenumbers.

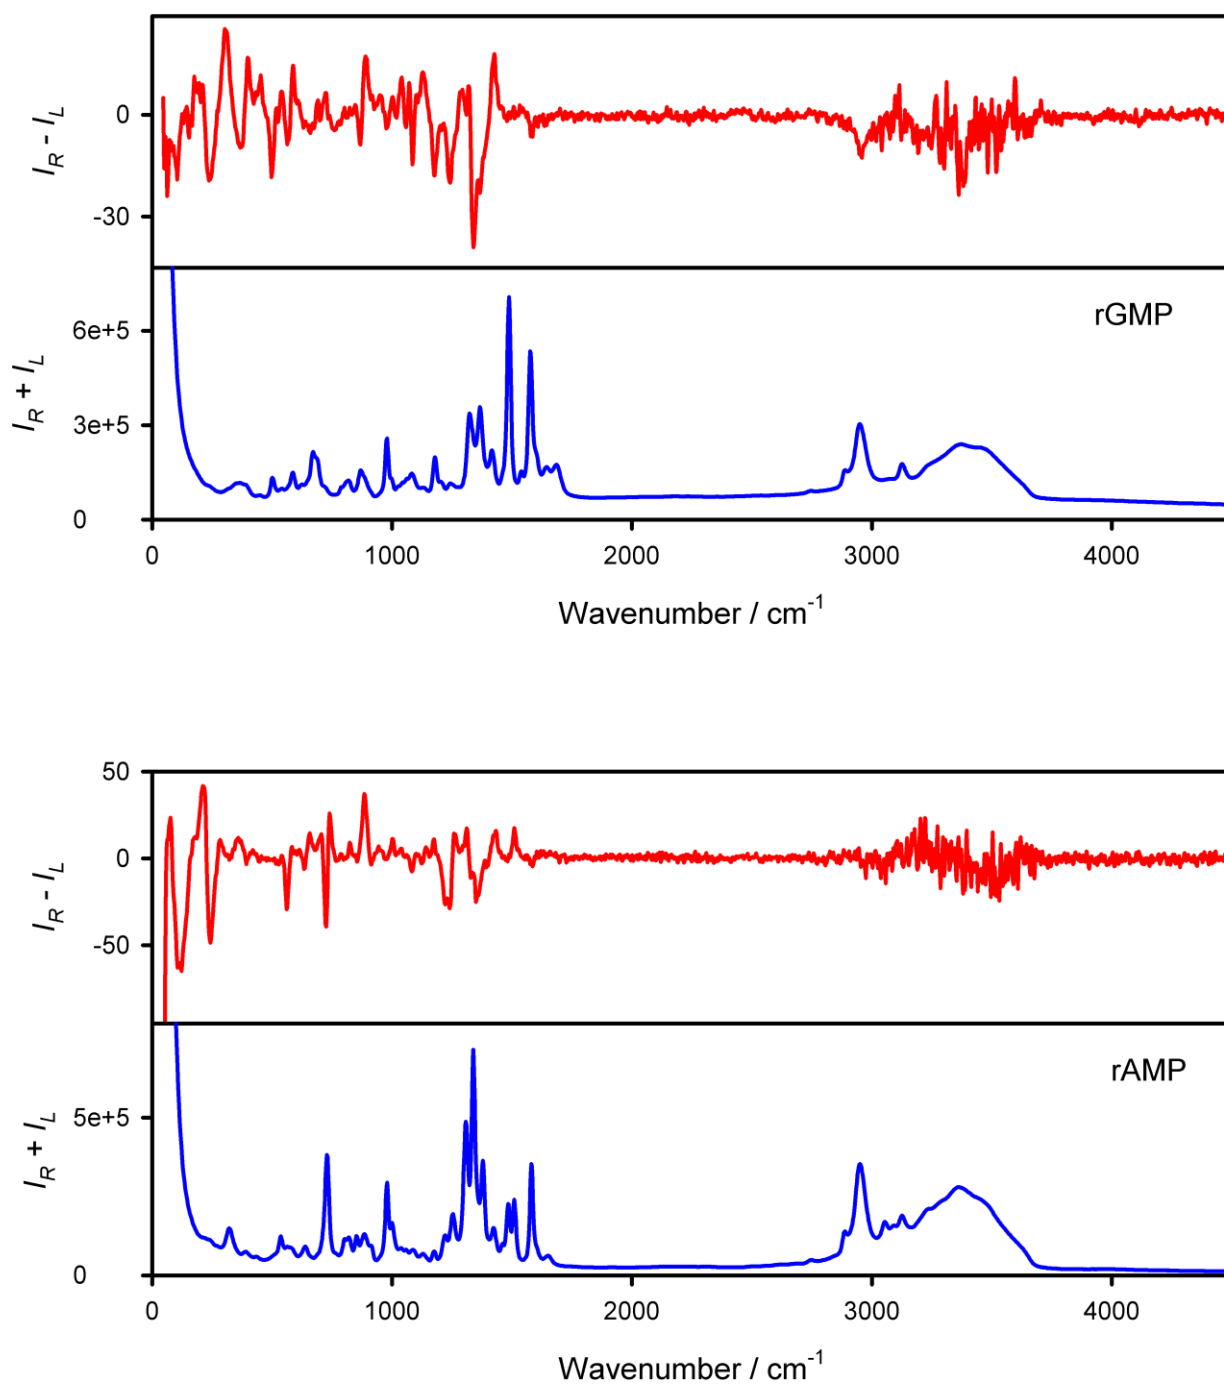

**Figure S9 (cont.).** Experimental Raman and ROA spectra in the full range of wavenumbers.
